# Supplementary material for: Tree Species Composition and Forest Community Types along Environmental Gradients in Htamanthi Wildlife Sanctuary, Myanmar: Implications for Action Prioritization in Conservation
Source: MDPI journal article supplement (doi:10.3390/plants11162180), 2022-08-22
Supplement: s1 [file s1]

## Supplementary Materials

**Table S1:** List of tree species surveyed in Htamanthi Wildlife Sanctuary.

| Community Type: Bamboo Forest (BF) |             |             |             |             |
|------------------------------------|-------------|-------------|-------------|-------------|
| SCIENTIFIC NAME                    | RDEN        | RDOM        | RFREQ       | IVI         |
| <b>ANACARDIACEAE</b>               |             |             |             |             |
| <i>Mangifera indica</i>            | 0.024       | 0.000       | 0.1000      | 0.124       |
| <i>Spondias pinnata</i>            | 0.024       | 0.004       | 0.1000      | 0.129       |
| <b>FABACEAE</b>                    |             |             |             |             |
| <i>Albizia chinensis</i>           | 0.024       | 0.009       | 0.1000      | 0.133       |
| <b>LYTHRACEAE</b>                  |             |             |             |             |
| <i>Duabanga grandiflora</i>        | 0.049       | 0.004       | 0.1000      | 0.153       |
| <b>MALVACEAE</b>                   |             |             |             |             |
| <i>Stereospermum colais</i>        | 0.024       | 0.003       | 0.1000      | 0.127       |
| <b>MELIACEAE</b>                   |             |             |             |             |
| <i>Dysoxylum acutangulum</i>       | 0.024       | 0.000       | 0.1000      | 0.124       |
| <i>Agliaia perviridis</i>          | 0.073       | 0.000       | 0.1000      | 0.173       |
| <b>MYRISTICACEAE</b>               |             |             |             |             |
| <i>Knema glauca</i>                | 0.024       | 0.000       | 0.1000      | 0.124       |
| <b>POACEAE</b>                     |             |             |             |             |
| <i>Dendrocalamus hamiltonii</i>    | 0.732       | 0.980       | 0.2000      | 1.912       |
| <b>Total</b>                       | <b>1.00</b> | <b>1.00</b> | <b>1.00</b> | <b>3.00</b> |

| Community Type: <i>Diospyros toposia</i> forest (DTF) |       |       |       |       |
|-------------------------------------------------------|-------|-------|-------|-------|
| SCIENTIFIC NAME                                       | RDEN  | RDOM  | RFREQ | IVI   |
| <b>ANACARDIACEAE</b>                                  |       |       |       |       |
| <i>Mangifera indica</i>                               | 0.016 | 0.023 | 0.033 | 0.072 |
| <b>ANNONACEAE</b>                                     |       |       |       |       |
| <i>Polyalthia crassa</i>                              | 0.011 | 0.000 | 0.011 | 0.022 |
| <b>APOCYNACEAE</b>                                    |       |       |       |       |
| <i>Alstonia rostrata</i>                              | 0.011 | 0.019 | 0.022 | 0.051 |
| <b>CALOPHYLLACEAE</b>                                 |       |       |       |       |
| <i>Mesua ferrea</i>                                   | 0.095 | 0.018 | 0.033 | 0.146 |
| <b>COMBRETACEAE</b>                                   |       |       |       |       |
| <i>Terminalia citrina</i>                             | 0.005 | 0.001 | 0.011 | 0.017 |
| <b>DILLENIACEAE</b>                                   |       |       |       |       |
| <i>Tetracera sarmentosa</i>                           | 0.005 | 0.000 | 0.011 | 0.016 |
| <b>DIPTEROCARPACEAE</b>                               |       |       |       |       |
| <i>Dipterocarpus baudii</i>                           | 0.011 | 0.001 | 0.011 | 0.022 |
| <i>Dipterocarpus retusus</i>                          | 0.079 | 0.070 | 0.044 | 0.193 |
| <i>Vatica maingayi</i>                                | 0.047 | 0.017 | 0.044 | 0.108 |
| <b>EBENACEAE</b>                                      |       |       |       |       |
| <i>Diospyros toposia</i>                              | 0.147 | 0.049 | 0.055 | 0.252 |
| <b>EUPHOBIAACEAE</b>                                  |       |       |       |       |
| <i>Balakata baccata</i>                               | 0.011 | 0.004 | 0.011 | 0.025 |

| SCIENTIFIC NAME                 | RDEN  | RDOM  | RFREQ | IVI   |
|---------------------------------|-------|-------|-------|-------|
| <i>Chrozophora plicata</i>      | 0.005 | 0.000 | 0.011 | 0.016 |
| <i>Triadica cochinchinensis</i> | 0.011 | 0.009 | 0.011 | 0.031 |
| <i>Croton sp. 23</i>            | 0.005 | 0.000 | 0.011 | 0.016 |
| <b>FABACEAE</b>                 |       |       |       |       |
| <i>Albizia chinensis</i>        | 0.005 | 0.007 | 0.011 | 0.024 |
| <i>Saraca indica</i>            | 0.026 | 0.003 | 0.044 | 0.073 |
| <i>Saraca sp.</i>               | 0.005 | 0.000 | 0.011 | 0.016 |
| <b>FAGACEAE</b>                 |       |       |       |       |
| <i>Castanopsis polystachyus</i> | 0.032 | 0.014 | 0.022 | 0.068 |
| <i>Castanopsis sp.2</i>         | 0.005 | 0.000 | 0.011 | 0.016 |
| <i>Castanopsis tribuloides</i>  | 0.026 | 0.027 | 0.033 | 0.086 |
| <i>Lithocarpus dealbatus</i>    | 0.026 | 0.017 | 0.022 | 0.066 |
| <i>Quercus glauca</i>           | 0.005 | 0.001 | 0.011 | 0.017 |
| <i>Quercus semiserrata</i>      | 0.016 | 0.001 | 0.011 | 0.028 |
| <b>IXONANTHACEAE</b>            |       |       |       |       |
| <i>Ixonanthes chinensis</i>     | 0.032 | 0.027 | 0.022 | 0.080 |
| <b>LAMIACEAE</b>                |       |       |       |       |
| <i>Tectona grandis</i>          | 0.047 | 0.107 | 0.022 | 0.177 |
| <i>Vitex sp. 2</i>              | 0.005 | 0.000 | 0.011 | 0.016 |
| <b>LAURACEA</b>                 |       |       |       |       |
| <i>Nothaphoebe condensa</i>     | 0.011 | 0.002 | 0.022 | 0.035 |
| <i>Actinodaphne bourdilonii</i> | 0.005 | 0.000 | 0.011 | 0.016 |
| <i>Actinodaphne sp.2</i>        | 0.005 | 0.001 | 0.011 | 0.017 |
| <i>Actinodaphne sp.3</i>        | 0.005 | 0.001 | 0.011 | 0.017 |
| <b>LOGANIACEAE</b>              |       |       |       |       |
| <i>Strychnos wallichiana</i>    | 0.011 | 0.001 | 0.011 | 0.022 |
| <b>MAGNOLIACEAE</b>             |       |       |       |       |
| <i>Magnolia sp.3</i>            | 0.011 | 0.005 | 0.011 | 0.027 |
| <b>MALVACEAE</b>                |       |       |       |       |
| <i>Hibiscus macrophyllus</i>    | 0.011 | 0.002 | 0.022 | 0.035 |
| <i>Pterospermum javanicum</i>   | 0.005 | 0.016 | 0.011 | 0.032 |
| <b>MELIACEAE</b>                |       |       |       |       |
| <i>Cedrela sp.</i>              | 0.005 | 0.008 | 0.011 | 0.024 |
| <i>Aglaia perviridis</i>        | 0.011 | 0.007 | 0.022 | 0.039 |
| <i>Chisocheton cumingianus</i>  | 0.011 | 0.005 | 0.022 | 0.038 |
| <b>MYRISTICACEAE</b>            |       |       |       |       |
| <i>Horsfieldia glabra</i>       | 0.011 | 0.003 | 0.011 | 0.025 |
| <i>Knema glauca</i>             | 0.005 | 0.000 | 0.011 | 0.016 |
| <b>MYRTACEAE</b>                |       |       |       |       |
| <i>Syzygium sp. 1</i>           | 0.011 | 0.008 | 0.011 | 0.030 |
| <i>Syzygium sp. 4</i>           | 0.005 | 0.002 | 0.011 | 0.018 |
| <i>Syzygium sp. 5</i>           | 0.011 | 0.004 | 0.011 | 0.025 |
| <b>OLACACEAE</b>                |       |       |       |       |
| <i>Anacolosa sp. 2</i>          | 0.011 | 0.003 | 0.022 | 0.035 |
| <b>PHYLLANTHACEAE</b>           |       |       |       |       |

| SCIENTIFIC NAME                 | RDEN        | RDOM        | RFREQ       | IVI         |
|---------------------------------|-------------|-------------|-------------|-------------|
| <i>Baccaurea ramiflora</i>      | 0.021       | 0.003       | 0.022       | 0.046       |
| <i>Phyllanthus emblica</i>      | 0.011       | 0.003       | 0.022       | 0.036       |
| <i>Antidesma</i> sp. 31         | 0.005       | 0.000       | 0.011       | 0.016       |
| <i>Aporosa roxburghii</i>       | 0.032       | 0.003       | 0.033       | 0.067       |
| <i>Aporosa</i> sp. 63           | 0.005       | 0.000       | 0.011       | 0.016       |
| <b>POACEAE</b>                  |             |             |             |             |
| <i>Dendrocalamus hamiltonii</i> | 0.047       | 0.498       | 0.033       | 0.578       |
| <b>POLYGALACEAE</b>             |             |             |             |             |
| <i>Xanthophyllum flavescens</i> | 0.005       | 0.002       | 0.011       | 0.018       |
| <b>ROSACEAE</b>                 |             |             |             |             |
| <i>Eribotrya</i> sp.            | 0.011       | 0.002       | 0.011       | 0.023       |
| <b>RUBIACEAE</b>                |             |             |             |             |
| <i>Wendlandia</i> sp. 1         | 0.011       | 0.001       | 0.022       | 0.034       |
| <b>RUTACEAE</b>                 |             |             |             |             |
| <i>Aegle marmelos</i>           | 0.005       | 0.000       | 0.011       | 0.017       |
| <b>SALICACEAE</b>               |             |             |             |             |
| <i>Flacourtia inermis</i>       | 0.011       | 0.004       | 0.011       | 0.025       |
| <b>SYMPLOCACEAE</b>             |             |             |             |             |
| <i>Symplocos</i> sp.1           | 0.005       | 0.001       | 0.011       | 0.017       |
| <b>Total</b>                    | <b>1.00</b> | <b>1.00</b> | <b>1.00</b> | <b>3.00</b> |

Community Type: *Nothaphoebe condensata* forest (NCF)

| SCIENTIFIC NAME               | RDEN  | RDOM  | RFREQ | IVI   |
|-------------------------------|-------|-------|-------|-------|
| <b>ACHARIACEAE</b>            |       |       |       |       |
| <i>Hydnocarpus kurzii</i>     | 0.046 | 0.009 | 0.025 | 0.080 |
| <b>ANACARDIACEAE</b>          |       |       |       |       |
| <i>Buchanania arborescens</i> | 0.005 | 0.000 | 0.004 | 0.009 |
| <i>Mangifera indica</i>       | 0.017 | 0.052 | 0.021 | 0.090 |
| <i>Holigarna helferi</i>      | 0.009 | 0.004 | 0.017 | 0.030 |
| <b>ANNONACEAE</b>             |       |       |       |       |
| <i>Polyalthia simiarum</i>    | 0.005 | 0.000 | 0.008 | 0.013 |
| <i>Polyalthia</i> sp.1        | 0.002 | 0.000 | 0.004 | 0.006 |
| <i>Polyalthia</i> sp.2        | 0.003 | 0.000 | 0.004 | 0.008 |
| <b>APOCYNACEAE</b>            |       |       |       |       |
| <i>Alstonia rostrata</i>      | 0.003 | 0.000 | 0.008 | 0.012 |
| <i>Alstonia scholaris</i>     | 0.002 | 0.000 | 0.004 | 0.006 |
| <b>ARALIACEAE</b>             |       |       |       |       |
| <i>Heteropanax fragrans</i>   | 0.002 | 0.000 | 0.004 | 0.006 |
| <b>ARECACEAE</b>              |       |       |       |       |
| <i>Caryota</i> sp.            | 0.003 | 0.001 | 0.004 | 0.008 |
| <i>Livistona jenkinsiana</i>  | 0.029 | 0.021 | 0.030 | 0.080 |
| <b>BURSERACEAE</b>            |       |       |       |       |
| <i>Canarium</i> sp.1          | 0.028 | 0.010 | 0.025 | 0.063 |
| <i>Canarium denticulatum</i>  | 0.003 | 0.005 | 0.004 | 0.012 |

| SCIENTIFIC NAME                 | RDEN  | RDOM  | RFREQ | IVI   |
|---------------------------------|-------|-------|-------|-------|
| <b>CALOPHYLLACEAE</b>           |       |       |       |       |
| <i>Mesua ferrea</i>             | 0.055 | 0.014 | 0.038 | 0.107 |
| <b>CLUSIACEAE</b>               |       |       |       |       |
| <i>Garcinia cowa</i>            | 0.018 | 0.003 | 0.008 | 0.030 |
| <i>Garcinia elliptica</i>       | 0.011 | 0.002 | 0.021 | 0.034 |
| <i>Garcinia xanthochymus</i>    | 0.018 | 0.002 | 0.017 | 0.037 |
| <b>COMBRETACEAE</b>             |       |       |       |       |
| <i>Terminalia bellerica</i>     | 0.002 | 0.001 | 0.004 | 0.006 |
| <i>Terminalia chebula</i>       | 0.005 | 0.005 | 0.008 | 0.018 |
| <i>Terminalia sp.2</i>          | 0.003 | 0.001 | 0.004 | 0.009 |
| <b>DILLENIACEAE</b>             |       |       |       |       |
| <i>Dillenia pentagyna</i>       | 0.005 | 0.005 | 0.013 | 0.022 |
| <b>DIPTERCARPACEAE</b>          |       |       |       |       |
| <i>Dipterocarpus retusus</i>    | 0.005 | 0.002 | 0.013 | 0.019 |
| <i>Vatica maingayi</i>          | 0.054 | 0.047 | 0.008 | 0.109 |
| <b>EBENACEAE</b>                |       |       |       |       |
| <i>Diospyros toposia</i>        | 0.046 | 0.013 | 0.030 | 0.089 |
| <b>EBENACEAE</b>                |       |       |       |       |
| <i>Mallotus paniculatus</i>     | 0.005 | 0.000 | 0.008 | 0.013 |
| <i>Mallotus philippinensis</i>  | 0.002 | 0.000 | 0.004 | 0.006 |
| <b>FABACEAE</b>                 |       |       |       |       |
| <i>Saraca indica</i>            | 0.003 | 0.000 | 0.008 | 0.012 |
| <i>Castanopsis indica</i>       | 0.006 | 0.002 | 0.008 | 0.017 |
| <i>Castanopsis polystachyus</i> | 0.003 | 0.000 | 0.008 | 0.012 |
| <i>Castanopsis tribuloides</i>  | 0.006 | 0.002 | 0.013 | 0.021 |
| <i>Lithocarpus dealbatus</i>    | 0.011 | 0.017 | 0.013 | 0.040 |
| <i>Lithocarpus fenestrata</i>   | 0.005 | 0.002 | 0.008 | 0.015 |
| <i>Lithocarpus sp.1</i>         | 0.002 | 0.001 | 0.004 | 0.007 |
| <i>Quercus glauca</i>           | 0.006 | 0.003 | 0.004 | 0.013 |
| <i>Quercus semiserrata</i>      | 0.009 | 0.004 | 0.008 | 0.022 |
| <b>LAMIACEAE</b>                |       |       |       |       |
| <i>Vitex sp. 1</i>              | 0.002 | 0.000 | 0.030 | 0.031 |
| <b>LAURACEA</b>                 |       |       |       |       |
| <i>Nothaphoebe condensa</i>     | 0.206 | 0.039 | 0.038 | 0.282 |
| <i>Phoebe sp.1</i>              | 0.002 | 0.000 | 0.004 | 0.006 |
| <i>Actinodaphne bourdilonii</i> | 0.005 | 0.000 | 0.013 | 0.017 |
| <i>Actinodaphne sp.3</i>        | 0.002 | 0.000 | 0.004 | 0.006 |
| <i>Cinnamomum nitidum</i>       | 0.002 | 0.000 | 0.004 | 0.006 |
| <i>Litsea sp.</i>               | 0.002 | 0.002 | 0.004 | 0.008 |
| <b>LYTHRACEAE</b>               |       |       |       |       |
| <i>Duabanga grandiflora</i>     | 0.005 | 0.001 | 0.008 | 0.014 |
| <b>MAGNOLIACEAE</b>             |       |       |       |       |
| <i>Magnolia macrophylla</i>     | 0.002 | 0.000 | 0.004 | 0.006 |
| <i>Magnolia praecalva</i>       | 0.011 | 0.001 | 0.013 | 0.024 |
| <i>Magnolia sp.1</i>            | 0.003 | 0.001 | 0.004 | 0.008 |

| SCIENTIFIC NAME                                | RDEN  | RDOM  | RFREQ | IVI   |
|------------------------------------------------|-------|-------|-------|-------|
| <i>Magnolia sp.2</i>                           | 0.005 | 0.005 | 0.008 | 0.018 |
| <i>Magnolia sp.3</i>                           | 0.002 | 0.010 | 0.004 | 0.015 |
| <b>MALVACEAE</b>                               |       |       |       |       |
| <i>Bombax insigne</i>                          | 0.002 | 0.013 | 0.004 | 0.019 |
| <i>Pterospermum aceroides</i>                  | 0.002 | 0.000 | 0.004 | 0.006 |
| <i>Pterospermum javanicum</i>                  | 0.002 | 0.002 | 0.004 | 0.008 |
| <i>Pterospermum semisagittatum</i>             | 0.002 | 0.001 | 0.004 | 0.007 |
| <i>Stereospermum colais</i>                    | 0.002 | 0.001 | 0.004 | 0.007 |
| <b>MELIACEAE</b>                               |       |       |       |       |
| <i>Dysoxylum acutangulum</i>                   | 0.006 | 0.004 | 0.013 | 0.023 |
| <i>Dysoxylum excelsum</i>                      | 0.002 | 0.000 | 0.004 | 0.006 |
| <i>Aglaia perviridis</i>                       | 0.008 | 0.001 | 0.017 | 0.026 |
| <i>Chisocheton cumingianus</i>                 | 0.014 | 0.002 | 0.021 | 0.037 |
| <i>Chisocheton cumingianus subsp. balansae</i> | 0.003 | 0.001 | 0.004 | 0.009 |
| <b>MORACEAE</b>                                |       |       |       |       |
| <i>Antiaris toxicaria</i>                      | 0.002 | 0.000 | 0.004 | 0.006 |
| <i>Artocarpus lacucha</i>                      | 0.003 | 0.005 | 0.008 | 0.016 |
| <i>Ficus sp. 1</i>                             | 0.002 | 0.001 | 0.004 | 0.006 |
| <i>Ficus sp. 6</i>                             | 0.002 | 0.001 | 0.004 | 0.006 |
| <b>MYRISTICACEAE</b>                           |       |       |       |       |
| <i>Knema furfuraceae</i>                       | 0.002 | 0.000 | 0.004 | 0.006 |
| <i>Knema glauca</i>                            | 0.029 | 0.003 | 0.034 | 0.066 |
| <i>Knema globularia</i>                        | 0.011 | 0.003 | 0.013 | 0.026 |
| <i>Knema linifolia</i>                         | 0.003 | 0.001 | 0.008 | 0.012 |
| <b>MYRTACEAE</b>                               |       |       |       |       |
| <i>Syzygium diospyrifolium</i>                 | 0.003 | 0.000 | 0.004 | 0.008 |
| <i>Syzygium megacarpum</i>                     | 0.002 | 0.001 | 0.004 | 0.007 |
| <i>Syzygium sp. 1</i>                          | 0.011 | 0.006 | 0.013 | 0.029 |
| <i>Syzygium sp. 10</i>                         | 0.002 | 0.000 | 0.004 | 0.006 |
| <i>Syzygium sp. 4</i>                          | 0.006 | 0.001 | 0.008 | 0.016 |
| <i>Syzygium sp. 8</i>                          | 0.002 | 0.003 | 0.004 | 0.008 |
| <b>OLACACEAE</b>                               |       |       |       |       |
| <i>Anacolosa sp. 1</i>                         | 0.006 | 0.001 | 0.008 | 0.016 |
| <i>Chionanthus ramiflorus</i>                  | 0.002 | 0.000 | 0.004 | 0.006 |
| <b>PANDACEAE</b>                               |       |       |       |       |
| <i>Galearia filiformis</i>                     | 0.006 | 0.000 | 0.013 | 0.019 |
| <b>PHYLLANTHACEAE</b>                          |       |       |       |       |
| <i>Baccaurea ramiflora</i>                     | 0.008 | 0.001 | 0.017 | 0.025 |
| <i>Aporosa roxburghii</i>                      | 0.023 | 0.002 | 0.021 | 0.046 |
| <b>POACEAE</b>                                 |       |       |       |       |
| <i>Dendrocalamus longispathus</i>              | 0.040 | 0.527 | 0.021 | 0.588 |
| <i>Pseudostachyum polymorphum</i>              | 0.020 | 0.093 | 0.004 | 0.117 |
| <b>POLYGALACEAE</b>                            |       |       |       |       |
| <i>Xanthophyllum flavescens</i>                | 0.025 | 0.005 | 0.013 | 0.043 |

| SCIENTIFIC NAME                | RDEN        | RDOM        | RFREQ       | IVI         |
|--------------------------------|-------------|-------------|-------------|-------------|
| <b>RHIZOPHORACEAE</b>          |             |             |             |             |
| <i>Carallia brachiata</i>      | 0.005       | 0.000       | 0.008       | 0.013       |
| <b>ROSACEAE</b>                |             |             |             |             |
| <i>Eribotrya bengalensis</i>   | 0.002       | 0.001       | 0.004       | 0.007       |
| <i>Eribotrya sp.</i>           | 0.002       | 0.001       | 0.004       | 0.006       |
| <b>RUBIACEAE</b>               |             |             |             |             |
| <i>Psydrax sp.</i>             | 0.003       | 0.001       | 0.008       | 0.012       |
| <i>Wendlandia sp. 1</i>        | 0.009       | 0.002       | 0.004       | 0.015       |
| <b>RUTACEAE</b>                |             |             |             |             |
| <i>Acronychia sp.</i>          | 0.003       | 0.001       | 0.004       | 0.008       |
| <i>Glycosmis sp. 1</i>         | 0.002       | 0.000       | 0.004       | 0.006       |
| <b>SALICACEAE</b>              |             |             |             |             |
| <i>Casearia sp.</i>            | 0.003       | 0.000       | 0.004       | 0.008       |
| <i>Flacourtia inermis</i>      | 0.003       | 0.000       | 0.008       | 0.012       |
| <b>SAPINDACEAE</b>             |             |             |             |             |
| <i>Xerospermum noronhianum</i> | 0.028       | 0.021       | 0.021       | 0.069       |
| <b>SYMPLOCACEAE</b>            |             |             |             |             |
| <i>Symplocos recemosa</i>      | 0.008       | 0.000       | 0.013       | 0.021       |
| <i>Symplocos sp.1</i>          | 0.006       | 0.003       | 0.013       | 0.021       |
| <i>Symplocos sp.2</i>          | 0.002       | 0.000       | 0.004       | 0.006       |
| <b>VITACEAE</b>                |             |             |             |             |
| <i>Leea macrophylla</i>        | 0.002       | 0.000       | 0.004       | 0.006       |
| <b>UNIDENTIFIED</b>            | 0.003       | 0.000       | 0.038       | 0.042       |
| <b>Total</b>                   | <b>1.00</b> | <b>1.00</b> | <b>1.00</b> | <b>3.00</b> |

Community Type: *Quercus glauca* forest (QGF)

| SCIENTIFIC NAME              | RDEN  | RDOM  | RFREQ | IVI   |
|------------------------------|-------|-------|-------|-------|
| <b>ACHARIACEAE</b>           |       |       |       |       |
| <i>Hydnocarpus kurzii</i>    | 0.024 | 0.012 | 0.034 | 0.070 |
| <b>ANACARDIACEAE</b>         |       |       |       |       |
| <i>Gluta sp.</i>             | 0.006 | 0.009 | 0.015 | 0.030 |
| <i>Mangifera indica</i>      | 0.001 | 0.001 | 0.005 | 0.007 |
| <i>Holigarna helferi</i>     | 0.007 | 0.028 | 0.020 | 0.055 |
| <b>ANNONACEAE</b>            |       |       |       |       |
| <i>Goniothalamus sp. 1</i>   | 0.001 | 0.000 | 0.005 | 0.006 |
| <i>Polyalthia crassa</i>     | 0.009 | 0.005 | 0.020 | 0.034 |
| <i>Polyalthia hookeriana</i> | 0.001 | 0.001 | 0.005 | 0.007 |
| <i>Polyalthia sp.1</i>       | 0.039 | 0.038 | 0.015 | 0.091 |
| <b>APOCYNACEAE</b>           |       |       |       |       |
| <i>Alstonia rostrata</i>     | 0.012 | 0.022 | 0.015 | 0.049 |
| <i>Holarrhena pubescens</i>  | 0.003 | 0.002 | 0.010 | 0.015 |
| <b>BURSERACEAE</b>           |       |       |       |       |

| SCIENTIFIC NAME                | RDEN  | RDOM  | RFREQ | IVI   |
|--------------------------------|-------|-------|-------|-------|
| <i>Canarium sp.1</i>           | 0.001 | 0.005 | 0.005 | 0.011 |
| <b>CALOPHYLLACEAE</b>          |       |       |       |       |
| <i>Mesua ferrea</i>            | 0.121 | 0.064 | 0.054 | 0.239 |
| <b>CLUSIACEAE</b>              |       |       |       |       |
| <i>Garcinia pedunculata</i>    | 0.024 | 0.009 | 0.039 | 0.072 |
| <i>Garcinia xanthochymus</i>   | 0.006 | 0.002 | 0.010 | 0.017 |
| <b>DILLENIACEAE</b>            |       |       |       |       |
| <i>Dillenia pentagyna</i>      | 0.006 | 0.009 | 0.010 | 0.025 |
| <b>DIPTERCARPACEAE</b>         |       |       |       |       |
| <i>Dipterocarpus kerrii</i>    | 0.004 | 0.041 | 0.005 | 0.050 |
| <i>Dipterocarpus retusus</i>   | 0.051 | 0.171 | 0.029 | 0.252 |
| <i>Vatica maingayi</i>         | 0.060 | 0.093 | 0.039 | 0.192 |
| <b>EBENACEAE</b>               |       |       |       |       |
| <i>Diospyros toposia</i>       | 0.085 | 0.044 | 0.054 | 0.183 |
| <b>EUPHORBIACEAE</b>           |       |       |       |       |
| <i>Macaranga denticulata</i>   | 0.004 | 0.000 | 0.010 | 0.015 |
| <b>FABACEAE</b>                |       |       |       |       |
| <i>Cynometra sp.</i>           | 0.003 | 0.004 | 0.010 | 0.016 |
| <i>Saraca indica</i>           | 0.007 | 0.001 | 0.010 | 0.019 |
| <i>Saraca sp.</i>              | 0.001 | 0.001 | 0.005 | 0.007 |
| <i>Xylia xylocarpa</i>         | 0.001 | 0.001 | 0.005 | 0.007 |
| <i>Castanopsis tribuloides</i> | 0.004 | 0.004 | 0.010 | 0.018 |
| <i>Lithocarpus elegans</i>     | 0.003 | 0.001 | 0.005 | 0.008 |
| <i>Lithocarpus fenestrata</i>  | 0.004 | 0.003 | 0.010 | 0.017 |
| <i>Quercus glauca</i>          | 0.174 | 0.086 | 0.049 | 0.309 |
| <b>IXONANTHACEAE</b>           |       |       |       |       |
| <i>Ixonanthes chinensis</i>    | 0.004 | 0.013 | 0.015 | 0.032 |
| <b>LAURACEAE</b>               |       |       |       |       |
| <i>Alseodaphne nigrescens</i>  | 0.003 | 0.005 | 0.010 | 0.017 |
| <i>Endiandra sp.</i>           | 0.001 | 0.005 | 0.005 | 0.011 |
| <i>Neolitsea zeylanica</i>     | 0.003 | 0.003 | 0.005 | 0.011 |
| <b>LOGANIACEAE</b>             |       |       |       |       |
| <i>Strychnos nux-blanda</i>    | 0.001 | 0.001 | 0.005 | 0.007 |
| <b>LYTHRACEAE</b>              |       |       |       |       |
| <i>Duabanga grandiflora</i>    | 0.045 | 0.010 | 0.039 | 0.094 |
| <i>Lagerstroemia sp.</i>       | 0.001 | 0.000 | 0.005 | 0.007 |
| <b>MAGNOLIACEAE</b>            |       |       |       |       |
| <i>Magnolia macrophylla</i>    | 0.001 | 0.000 | 0.005 | 0.007 |
| <i>Magnolia sp.1</i>           | 0.013 | 0.024 | 0.010 | 0.047 |
| <i>Magnolia sp.3</i>           | 0.003 | 0.003 | 0.005 | 0.011 |
| <b>MALVACEAE</b>               |       |       |       |       |
| <i>Pterospermum javanicum</i>  | 0.019 | 0.031 | 0.020 | 0.070 |

| SCIENTIFIC NAME                                | RDEN        | RDOM        | RFREQ       | IVI         |
|------------------------------------------------|-------------|-------------|-------------|-------------|
| <i>Sterculia macrophylla</i>                   | 0.004       | 0.002       | 0.010       | 0.016       |
| <i>Stereospermum colais</i>                    | 0.001       | 0.004       | 0.005       | 0.010       |
| <b>MELIACEAE</b>                               |             |             |             |             |
| <i>Dysoxylum acutangulum</i>                   | 0.004       | 0.002       | 0.010       | 0.017       |
| <i>Chisocheton cumingianus</i>                 | 0.003       | 0.018       | 0.005       | 0.026       |
| <i>Chisocheton cumingianus subsp. balansae</i> | 0.001       | 0.004       | 0.005       | 0.010       |
| <b>MORACEAE</b>                                |             |             |             |             |
| <i>Ficus sp.2</i>                              | 0.003       | 0.001       | 0.005       | 0.009       |
| <b>MYRISTICACEAE</b>                           |             |             |             |             |
| <i>Horsfieldia glabra</i>                      | 0.001       | 0.001       | 0.005       | 0.007       |
| <i>Knema glauca</i>                            | 0.052       | 0.010       | 0.059       | 0.121       |
| <b>MYRTACEAE</b>                               |             |             |             |             |
| <i>Syzygium sp. 1</i>                          | 0.022       | 0.018       | 0.044       | 0.085       |
| <i>Syzygium sp. 2</i>                          | 0.004       | 0.001       | 0.010       | 0.016       |
| <i>Syzygium sp. 4</i>                          | 0.003       | 0.001       | 0.005       | 0.009       |
| <b>OLACACEAE</b>                               |             |             |             |             |
| <i>Anacolosa sp. 2</i>                         | 0.006       | 0.003       | 0.010       | 0.018       |
| <b>PANDACEAE</b>                               |             |             |             |             |
| <i>Galearia filiformis</i>                     | 0.003       | 0.000       | 0.005       | 0.008       |
| <b>PHYLLANTHACEAE</b>                          |             |             |             |             |
| <i>Baccaurea ramiflora</i>                     | 0.015       | 0.004       | 0.034       | 0.054       |
| <i>Aporosa roxburghii</i>                      | 0.013       | 0.004       | 0.025       | 0.042       |
| <b>PITTOSPORANCEAE</b>                         |             |             |             |             |
| <i>Pittosporum sp.</i>                         | 0.004       | 0.003       | 0.015       | 0.022       |
| <b>POACEAE</b>                                 |             |             |             |             |
| <i>Dendrocalamus hamiltonii</i>                | 0.001       | 0.085       | 0.005       | 0.092       |
| <b>POLYGALACEAE</b>                            |             |             |             |             |
| <i>Xanthophyllum flavescens</i>                | 0.016       | 0.011       | 0.025       | 0.052       |
| <b>ROSACEAE</b>                                |             |             |             |             |
| <i>Eriobotrya bengalensis</i>                  | 0.003       | 0.001       | 0.005       | 0.009       |
| <b>RUTACEAE</b>                                |             |             |             |             |
| <i>Aegle marmelos</i>                          | 0.004       | 0.003       | 0.010       | 0.018       |
| <i>Atalantia sp.</i>                           | 0.010       | 0.007       | 0.010       | 0.027       |
| <b>SAPINDACEAE</b>                             |             |             |             |             |
| <i>Xerospermum noronhianum</i>                 | 0.040       | 0.058       | 0.049       | 0.148       |
| <b>ULMACEAE</b>                                |             |             |             |             |
| <i>Gironniera subaequalis</i>                  | 0.001       | 0.000       | 0.005       | 0.007       |
| Unidentified                                   | 0.013       | 0.008       | 0.020       | 0.042       |
| <b>Total</b>                                   | <b>1.00</b> | <b>1.00</b> | <b>1.00</b> | <b>3.00</b> |

Community Type: *Vatica maingayi* forest (VMF)

| SCIENTIFIC NAME           | RDEN  | RDOM  | RFREQ | IVI   |
|---------------------------|-------|-------|-------|-------|
| <b>ACHARIACEAE</b>        |       |       |       |       |
| <i>Hydnocarpus kurzii</i> | 0.043 | 0.022 | 0.028 | 0.093 |



| SCIENTIFIC NAME               | RDEN  | RDOM  | RFREQ | IVI   |
|-------------------------------|-------|-------|-------|-------|
| <i>Hydnocarpus macrocarpa</i> | 0.010 | 0.005 | 0.010 | 0.025 |
| <i>Hydnocarpus sp.</i>        | 0.000 | 0.001 | 0.001 | 0.003 |
| <b>ANACARDIACEAE</b>          |       |       |       |       |
| <i>Buchanania arborescens</i> | 0.003 | 0.001 | 0.005 | 0.008 |
| <i>Gluta sp.</i>              | 0.001 | 0.000 | 0.002 | 0.004 |
| <i>Mangifera indica</i>       | 0.005 | 0.007 | 0.005 | 0.017 |
| <i>Mangifera sp.</i>          | 0.001 | 0.000 | 0.002 | 0.003 |
| <i>Spondias pinnata</i>       | 0.000 | 0.001 | 0.001 | 0.003 |
| <i>Holigarna helferi</i>      | 0.016 | 0.022 | 0.019 | 0.058 |
| <b>ANNONACEAE</b>             |       |       |       |       |
| <i>Goniothalamus sp. 2</i>    | 0.000 | 0.001 | 0.001 | 0.002 |
| <i>Polyalthia crassa</i>      | 0.004 | 0.001 | 0.010 | 0.015 |
| <i>Polyalthia hookeriana</i>  | 0.004 | 0.009 | 0.007 | 0.020 |
| <i>Polyalthia simiarum</i>    | 0.009 | 0.002 | 0.010 | 0.021 |
| <i>Polyalthia sp.1</i>        | 0.042 | 0.064 | 0.014 | 0.120 |
| <i>Polyalthia sp.2</i>        | 0.003 | 0.000 | 0.001 | 0.004 |
| <b>APOCYNACEAE</b>            |       |       |       |       |
| <i>Alstonia rostrata</i>      | 0.004 | 0.003 | 0.010 | 0.017 |
| <i>Alstonia scholaris</i>     | 0.001 | 0.000 | 0.002 | 0.004 |
| <b>ARALIACEAE</b>             |       |       |       |       |
| <i>Heteropanax fragrans</i>   | 0.000 | 0.000 | 0.001 | 0.002 |
| <i>Macropanax dispermus</i>   | 0.001 | 0.000 | 0.001 | 0.003 |
| <i>Trevesia palmata</i>       | 0.001 | 0.000 | 0.001 | 0.002 |
| <b>ARECACEAE</b>              |       |       |       |       |
| <i>Areca triandra</i>         | 0.002 | 0.000 | 0.002 | 0.005 |
| <i>Livistona jenkinsiana</i>  | 0.019 | 0.038 | 0.018 | 0.075 |
| <b>BURSERACEAE</b>            |       |       |       |       |
| <i>Canarium sp.1</i>          | 0.007 | 0.004 | 0.011 | 0.022 |
| <i>Canarium denticulatum</i>  | 0.000 | 0.000 | 0.001 | 0.002 |
| <b>CALOPHYLLACEAE</b>         |       |       |       |       |
| <i>Mesua ferrea</i>           | 0.102 | 0.065 | 0.041 | 0.208 |
| <b>CLUSIACEAE</b>             |       |       |       |       |
| <i>Garcinia cowa</i>          | 0.032 | 0.008 | 0.028 | 0.067 |
| <i>Garcinia elliptica</i>     | 0.005 | 0.001 | 0.007 | 0.013 |
| <i>Garcinia pedunculata</i>   | 0.013 | 0.006 | 0.013 | 0.031 |
| <i>Garcinia xanthochymus</i>  | 0.014 | 0.004 | 0.017 | 0.035 |
| <b>COMBRETACEAE</b>           |       |       |       |       |
| <i>Terminalia chebula</i>     | 0.002 | 0.001 | 0.006 | 0.009 |
| <i>Terminalia citrina</i>     | 0.001 | 0.008 | 0.001 | 0.010 |
| <i>Terminalia sp.2</i>        | 0.000 | 0.001 | 0.001 | 0.003 |
| <b>CRYPTERONIACEAE</b>        |       |       |       |       |
| <i>Crypteronia paniculata</i> | 0.006 | 0.024 | 0.008 | 0.039 |
| <i>Cyatheaaceae</i>           |       |       |       |       |
| <i>Cyathea sp.</i>            | 0.001 | 0.000 | 0.001 | 0.003 |
| <b>DILLENIACEAE</b>           |       |       |       |       |

| SCIENTIFIC NAME                 | RDEN  | RDOM  | RFREQ | IVI   |
|---------------------------------|-------|-------|-------|-------|
| <i>Dillenia pentagyna</i>       | 0.005 | 0.025 | 0.007 | 0.037 |
| <b>DIPTERCARPACEAE</b>          |       |       |       |       |
| <i>Dipterocarpus baudii</i>     | 0.002 | 0.001 | 0.002 | 0.005 |
| <i>Dipterocarpus retusus</i>    | 0.014 | 0.015 | 0.013 | 0.042 |
| <i>Hopea oblongifolia</i>       | 0.000 | 0.000 | 0.001 | 0.002 |
| <i>Vatica maingayi</i>          | 0.115 | 0.202 | 0.042 | 0.359 |
| <b>EBENACEAE</b>                |       |       |       |       |
| <i>Diospyros apliculata</i>     | 0.000 | 0.000 | 0.001 | 0.002 |
| <i>Diospyros sp. 2</i>          | 0.008 | 0.005 | 0.012 | 0.025 |
| <i>Diospyros sp.1</i>           | 0.001 | 0.001 | 0.004 | 0.006 |
| <i>Diospyros toposia</i>        | 0.029 | 0.017 | 0.028 | 0.073 |
| <b>ELAEOCARPACEAE</b>           |       |       |       |       |
| <i>Elaeocarpus sp.</i>          | 0.000 | 0.000 | 0.001 | 0.002 |
| <i>Sloanea sigun</i>            | 0.000 | 0.000 | 0.001 | 0.002 |
| <b>ERICACEAE</b>                |       |       |       |       |
| <i>Lyonia sp.</i>               | 0.000 | 0.000 | 0.001 | 0.002 |
| <b>EUPHOBIAEAE</b>              |       |       |       |       |
| <i>Balakata baccata</i>         | 0.001 | 0.003 | 0.002 | 0.006 |
| <i>Chrozophora plicata</i>      | 0.002 | 0.000 | 0.005 | 0.008 |
| <i>Croton sp. 23</i>            | 0.000 | 0.000 | 0.001 | 0.002 |
| <i>Croton sp.1</i>              | 0.000 | 0.000 | 0.001 | 0.002 |
| <b>FABACEAE</b>                 |       |       |       |       |
| <i>Albizia odoratissima</i>     | 0.000 | 0.000 | 0.001 | 0.002 |
| <i>Castanospermum australe</i>  | 0.000 | 0.000 | 0.001 | 0.002 |
| <i>Cynometra sp.</i>            | 0.015 | 0.028 | 0.017 | 0.060 |
| <i>Saraca indica</i>            | 0.007 | 0.001 | 0.007 | 0.015 |
| <b>FAGACEAE</b>                 |       |       |       |       |
| <i>Castanopsis indica</i>       | 0.004 | 0.001 | 0.006 | 0.010 |
| <i>Castanopsis polystachyus</i> | 0.009 | 0.011 | 0.012 | 0.032 |
| <i>Castanopsis sp.1</i>         | 0.001 | 0.001 | 0.002 | 0.004 |
| <i>Castanopsis tribuloides</i>  | 0.002 | 0.003 | 0.004 | 0.009 |
| <i>Lithocarpus dealbatus</i>    | 0.000 | 0.000 | 0.001 | 0.002 |
| <i>Lithocarpus elegans</i>      | 0.000 | 0.000 | 0.001 | 0.002 |
| <i>Lithocarpus fenestrata</i>   | 0.003 | 0.002 | 0.007 | 0.012 |
| <i>Lithocarpus sp.1</i>         | 0.002 | 0.000 | 0.001 | 0.004 |
| <i>Quercus helferiana</i>       | 0.001 | 0.000 | 0.001 | 0.003 |
| <i>Quercus semiserrata</i>      | 0.004 | 0.001 | 0.005 | 0.009 |
| <b>GIRONNIERA</b>               |       |       |       |       |
| <i>Gironniera subaequalis</i>   | 0.004 | 0.011 | 0.007 | 0.022 |
| <b>IXONANTHACEAE</b>            |       |       |       |       |
| <i>Ixonanthes chinensis</i>     | 0.009 | 0.033 | 0.011 | 0.053 |
| <b>LAMIACEAE</b>                |       |       |       |       |
| <i>Callicarpa tomentosa</i>     | 0.000 | 0.001 | 0.001 | 0.003 |
| <b>LAURACEA</b>                 |       |       |       |       |
| <i>Beilschmiedia sp. 1</i>      | 0.000 | 0.001 | 0.001 | 0.003 |

| SCIENTIFIC NAME                                       | RDEN  | RDOM  | RFREQ | IVI   |
|-------------------------------------------------------|-------|-------|-------|-------|
| <i>Beilschmiedia</i> sp. 2                            | 0.000 | 0.000 | 0.001 | 0.002 |
| <i>Nothaphoebe condensa</i>                           | 0.086 | 0.040 | 0.030 | 0.156 |
| <i>Phoebe lanceolata</i>                              | 0.003 | 0.003 | 0.006 | 0.012 |
| <i>Phoebe</i> sp. 4                                   | 0.000 | 0.000 | 0.001 | 0.002 |
| <i>Phoebe</i> sp.1                                    | 0.002 | 0.002 | 0.005 | 0.008 |
| <i>Phoebe</i> sp. 33                                  | 0.000 | 0.000 | 0.001 | 0.002 |
| <i>Actinodaphne bourdilonii</i>                       | 0.008 | 0.002 | 0.011 | 0.021 |
| <i>Actinodaphne</i> sp.1                              | 0.001 | 0.000 | 0.004 | 0.006 |
| <i>Actinodaphne</i> sp.3                              | 0.008 | 0.003 | 0.012 | 0.023 |
| <i>Actinodaphne</i> sp.4                              | 0.001 | 0.000 | 0.001 | 0.002 |
| <i>Actinodaphne</i> sp.5                              | 0.001 | 0.000 | 0.002 | 0.004 |
| <i>Alseodaphne nigrescens</i>                         | 0.002 | 0.000 | 0.004 | 0.006 |
| <i>Cinnamomum nitidum</i>                             | 0.002 | 0.000 | 0.005 | 0.007 |
| <i>Cinnamomum</i> sp.                                 | 0.001 | 0.002 | 0.002 | 0.006 |
| <i>Endiandra</i> sp.                                  | 0.008 | 0.004 | 0.005 | 0.016 |
| <i>Litsea</i> sp.                                     | 0.001 | 0.000 | 0.002 | 0.003 |
| <b>LECYTHIDACEAE</b>                                  |       |       |       |       |
| <i>Barringtonia macrocarpa</i>                        | 0.000 | 0.000 | 0.001 | 0.002 |
| <i>Barringtonia macrostachya</i>                      | 0.001 | 0.000 | 0.002 | 0.004 |
| <b>LOGANIACEAE</b>                                    |       |       |       |       |
| <i>Strychnos potatorum</i>                            | 0.000 | 0.001 | 0.001 | 0.002 |
| <b>MAGNOLIACEAE</b>                                   |       |       |       |       |
| <i>Magnolia praecalva</i>                             | 0.005 | 0.001 | 0.006 | 0.012 |
| <i>Magnolia</i> sp.1                                  | 0.005 | 0.004 | 0.007 | 0.016 |
| <i>Magnolia</i> sp.2                                  | 0.001 | 0.012 | 0.002 | 0.016 |
| <i>Magnolia</i> sp.3                                  | 0.000 | 0.000 | 0.001 | 0.002 |
| <b>MALVACEAE</b>                                      |       |       |       |       |
| <i>Pterospermum aceroides</i>                         | 0.003 | 0.006 | 0.004 | 0.013 |
| <i>Pterospermum diversifolium</i>                     | 0.007 | 0.012 | 0.010 | 0.029 |
| <i>Pterospermum javanicum</i>                         | 0.005 | 0.008 | 0.008 | 0.021 |
| <i>Pterygota alata</i>                                | 0.001 | 0.017 | 0.004 | 0.022 |
| <i>Sterculia macrophylla</i>                          | 0.004 | 0.005 | 0.010 | 0.019 |
| <i>Stereospermum colais</i>                           | 0.000 | 0.000 | 0.001 | 0.002 |
| <i>Cedrela</i> sp.                                    | 0.000 | 0.000 | 0.001 | 0.002 |
| <i>Dysoxylum acutangulum</i>                          | 0.001 | 0.001 | 0.002 | 0.004 |
| <i>Dysoxylum</i> sp.                                  | 0.000 | 0.000 | 0.001 | 0.002 |
| <i>Aglaia perviridis</i>                              | 0.012 | 0.010 | 0.018 | 0.040 |
| <i>Aglaia tomentosa</i>                               | 0.001 | 0.000 | 0.002 | 0.004 |
| <i>Chisocheton cumingianus</i>                        | 0.033 | 0.025 | 0.034 | 0.092 |
| <i>Chisocheton cumingianus</i> subsp. <i>balansae</i> | 0.002 | 0.000 | 0.006 | 0.009 |
| <b>MORACEAE</b>                                       |       |       |       |       |
| <i>Antiaris toxicaria</i>                             | 0.002 | 0.002 | 0.002 | 0.006 |
| <i>Ficus</i> sp. 1                                    | 0.000 | 0.000 | 0.001 | 0.002 |
| <i>Ficus</i> sp.2                                     | 0.001 | 0.016 | 0.001 | 0.018 |
| <i>Ficus</i> sp.3                                     | 0.000 | 0.000 | 0.001 | 0.002 |

| SCIENTIFIC NAME                   | RDEN  | RDOM  | RFREQ | IVI   |
|-----------------------------------|-------|-------|-------|-------|
| <i>Ficus sp.9</i>                 | 0.000 | 0.000 | 0.001 | 0.002 |
| <b>MYRISTICACEAE</b>              |       |       |       |       |
| <i>Horsfieldia glabra</i>         | 0.003 | 0.001 | 0.006 | 0.010 |
| <i>Knema erratica</i>             | 0.000 | 0.000 | 0.001 | 0.002 |
| <i>Knema furfuraceae</i>          | 0.006 | 0.001 | 0.010 | 0.016 |
| <i>Knema glauca</i>               | 0.022 | 0.005 | 0.024 | 0.050 |
| <i>Knema globularia</i>           | 0.019 | 0.004 | 0.022 | 0.045 |
| <i>Knema sp. 1</i>                | 0.000 | 0.000 | 0.001 | 0.002 |
| <b>MYRTACEAE</b>                  |       |       |       |       |
| <i>Syzygium diospyrifolium</i>    | 0.000 | 0.000 | 0.001 | 0.002 |
| <i>Syzygium megacarpum</i>        | 0.003 | 0.003 | 0.004 | 0.010 |
| <i>Syzygium sp. 1</i>             | 0.010 | 0.005 | 0.017 | 0.032 |
| <i>Syzygium sp. 10</i>            | 0.003 | 0.003 | 0.007 | 0.013 |
| <i>Syzygium sp. 2</i>             | 0.003 | 0.001 | 0.002 | 0.007 |
| <i>Syzygium sp. 3</i>             | 0.001 | 0.002 | 0.004 | 0.007 |
| <i>Syzygium sp. 4</i>             | 0.005 | 0.002 | 0.006 | 0.013 |
| <i>Syzygium sp. 5</i>             | 0.004 | 0.001 | 0.006 | 0.011 |
| <i>Syzygium sp. 9</i>             | 0.000 | 0.001 | 0.001 | 0.003 |
| <b>OLACACEAE</b>                  |       |       |       |       |
| <i>Anacolosa sp. 1</i>            | 0.000 | 0.000 | 0.001 | 0.002 |
| <i>Chionanthus decipiens</i>      | 0.000 | 0.000 | 0.001 | 0.002 |
| <i>Chionanthus ramiflorus</i>     | 0.000 | 0.000 | 0.001 | 0.002 |
| <b>PANDACEAE</b>                  |       |       |       |       |
| <i>Galearia filiformis</i>        | 0.011 | 0.001 | 0.019 | 0.032 |
| <b>PENTAPHYLACEAE</b>             |       |       |       |       |
| <i>Eurya acuminata</i>            | 0.000 | 0.000 | 0.001 | 0.002 |
| <b>PHYLLANTHACEAE</b>             |       |       |       |       |
| <i>Baccaurea ramiflora</i>        | 0.016 | 0.003 | 0.025 | 0.044 |
| <i>Glochidion sp.</i>             | 0.001 | 0.000 | 0.001 | 0.002 |
| <i>Glochidion superbum</i>        | 0.000 | 0.000 | 0.001 | 0.002 |
| <i>Antidesma sp. 31</i>           | 0.000 | 0.000 | 0.001 | 0.002 |
| <i>Aporosa roxburghii</i>         | 0.006 | 0.001 | 0.008 | 0.015 |
| <i>Aporosa sp. 63</i>             | 0.000 | 0.000 | 0.001 | 0.002 |
| <b>PITTOSPORANCEAE</b>            |       |       |       |       |
| <i>Pittosporum sp.</i>            | 0.001 | 0.000 | 0.004 | 0.005 |
| <b>POACEAE</b>                    |       |       |       |       |
| <i>Dendrocalamus longispathus</i> | 0.009 | 0.015 | 0.005 | 0.029 |
| <i>Pseudostachyum polymorphum</i> | 0.002 | 0.076 | 0.002 | 0.080 |
| <b>PODOCARPACEAE</b>              |       |       |       |       |
| <i>Podocarpus neriifolius</i>     | 0.001 | 0.000 | 0.002 | 0.003 |
| <i>Podocarpus wallichianus</i>    | 0.000 | 0.000 | 0.001 | 0.002 |
| <b>POLYGALACEAE</b>               |       |       |       |       |
| <i>Xanthophyllum flavescens</i>   | 0.017 | 0.007 | 0.016 | 0.039 |
| <b>PRIMULACEAE</b>                |       |       |       |       |
| <i>Ardisia sp.3</i>               | 0.000 | 0.000 | 0.001 | 0.002 |

| SCIENTIFIC NAME                | RDEN        | RDOM        | RFREQ       | IVI         |
|--------------------------------|-------------|-------------|-------------|-------------|
| <b>RHIZOPHORACEAE</b>          |             |             |             |             |
| <i>Carallia brachiata</i>      | 0.002       | 0.001       | 0.005       | 0.008       |
| <i>Carallia sp. 22</i>         | 0.000       | 0.001       | 0.001       | 0.002       |
| <b>ROSACEAE</b>                |             |             |             |             |
| <i>Eriobotrya bengalensis</i>  | 0.003       | 0.001       | 0.005       | 0.009       |
| <b>RUBIACEAE</b>               |             |             |             |             |
| <i>Brachytome sp.</i>          | 0.001       | 0.000       | 0.001       | 0.002       |
| <i>Gardenia sp.</i>            | 0.000       | 0.000       | 0.001       | 0.002       |
| <i>Ixora sp.2</i>              | 0.002       | 0.001       | 0.005       | 0.009       |
| <i>Nauclea orientalis</i>      | 0.000       | 0.000       | 0.001       | 0.002       |
| <i>Pavetta indica</i>          | 0.000       | 0.000       | 0.001       | 0.002       |
| <i>Psydrax sp.</i>             | 0.001       | 0.001       | 0.001       | 0.004       |
| <i>Rennellia sp.2</i>          | 0.000       | 0.000       | 0.001       | 0.002       |
| <i>Tarennoidea wallichii</i>   | 0.000       | 0.000       | 0.001       | 0.002       |
| <i>Wendlandia paniculata</i>   | 0.000       | 0.000       | 0.001       | 0.002       |
| <i>Wendlandia puberula</i>     | 0.000       | 0.000       | 0.001       | 0.002       |
| <b>RUTACEAE</b>                |             |             |             |             |
| <i>Atalantia sp.</i>           | 0.005       | 0.001       | 0.007       | 0.013       |
| <i>Clausena heptaphylla</i>    | 0.001       | 0.000       | 0.001       | 0.002       |
| <i>Glycosmis sp. 1</i>         | 0.001       | 0.000       | 0.001       | 0.003       |
| <b>SALICACEAE</b>              |             |             |             |             |
| <i>Flacourtia inermis</i>      | 0.000       | 0.000       | 0.001       | 0.002       |
| <b>SAPINDACEAE</b>             |             |             |             |             |
| <i>Xerospermum noronhianum</i> | 0.010       | 0.012       | 0.019       | 0.041       |
| <b>SAPOTACEAE</b>              |             |             |             |             |
| <i>Palaquium sp.</i>           | 0.000       | 0.000       | 0.001       | 0.002       |
| <b>SYMPLOCACEAE</b>            |             |             |             |             |
| <i>Symplocos recemosa</i>      | 0.002       | 0.001       | 0.005       | 0.008       |
| <b>TERNSTROEMIACEAE</b>        |             |             |             |             |
| <i>Ternstroemia sp.</i>        | 0.001       | 0.002       | 0.001       | 0.004       |
| <b>TETRAMELACEAE</b>           |             |             |             |             |
| <i>Tetrameles nudiflora</i>    | 0.000       | 0.001       | 0.001       | 0.003       |
| <b>UNIDENTIFIED</b>            | 0.003       | 0.002       | 0.005       | 0.009       |
| <b>Total</b>                   | <b>1.00</b> | <b>1.00</b> | <b>1.00</b> | <b>3.00</b> |

**Table S2:** P values estimated by Kruskal-Wallis test for soil physical properties across soil depths and forest communities. Hd – mean hardness of soil, MC – moisture content, BD – bulk density, OM – organic matter, Sand – content of sand, Silt – content of silt, Clay – content of clay. df – degree of freedom and H – Kruskal-Wallis chi-squared, N = 64, df = 3, p-values at  $\alpha = 0.05$ .

| Physical properties of soil | 0 -15 cm depth of soil |                  | 15 - 30 cm depth of soil |                  | 0 - 30 cm depth of soil (Mean) |                  |
|-----------------------------|------------------------|------------------|--------------------------|------------------|--------------------------------|------------------|
|                             | H                      | p-value          | H                        | p-value          | H                              | p-value          |
| Hd                          | 3.34                   | 0.342            | 8.29                     | <b>&lt;0.05</b>  | 9.87                           | <b>&lt;0.05</b>  |
| MC                          | 15.70                  | <b>&lt;0.05</b>  | 21.01                    | <b>&lt;0.001</b> | 36.13                          | <b>&lt;0.001</b> |
| BD                          | 7.26                   | 0.064            | 5.57                     | 0.135            | 10.21                          | <b>&lt;0.05</b>  |
| OM                          | 2.20                   | 0.532            | 4.91                     | 0.178            | 6.27                           | 0.099            |
| Sand                        | 12.04                  | <b>&lt;0.05</b>  | 7.64                     | 0.054            | 17.76                          | <b>&lt;0.001</b> |
| Silt                        | 3.82                   | 0.281            | 3.26                     | 0.354            | 6.58                           | 0.087            |
| Clay                        | 19.73                  | <b>&lt;0.001</b> | 15.16                    | <b>&lt;0.05</b>  | 32.18                          | <b>&lt;0.001</b> |

**Table S3:** P values estimated by Kruskal-Wallis test for soil chemical properties across soil depths and forest communities. pH – soil pH, TN – Total nitrogen, Ava. P – Available phosphorus, K – Extractable potassium, Ca – Extractable calcium, Na – Extractable sodium, and Mg – Extractable magnesium. df – degree of freedom and H – Kruskal-Wallis chi-squared, N = 64, df = 3, p-values at  $\alpha = 0.05$ .

| Chemical properties of soil | 0 -15 cm depth of soil |                  | 15 - 30 cm depth of soil |                  | 0 - 30 cm depth of soil (Mean) |                  |
|-----------------------------|------------------------|------------------|--------------------------|------------------|--------------------------------|------------------|
|                             | H                      | p-value          | H                        | p-value          | H                              | p-value          |
| pH                          | 7.25                   | 0.064            | 2.22                     | 0.527            | 8.21                           | 0.042            |
| TN                          | 2.12                   | 0.548            | 0.42                     | 0.936            | 1.79                           | 0.618            |
| Ava. P                      | 13.43                  | <b>&lt;0.05</b>  | 13.48                    | <b>&lt;0.05</b>  | 26.52                          | <b>&lt;0.001</b> |
| K                           | 6.49                   | 0.090            | 6.38                     | 0.095            | 13.04                          | <b>&lt;0.05</b>  |
| Ca                          | 12.46                  | <b>&lt;0.05</b>  | 17.45                    | <b>&lt;0.001</b> | 26.52                          | <b>&lt;0.001</b> |
| Na                          | 4.25                   | 0.235            | 5.43                     | 0.143            | 9.63                           | <b>&lt;0.05</b>  |
| Mg                          | 16.71                  | <b>&lt;0.001</b> | 11.29                    | <b>&lt;0.05</b>  | 27.37                          | <b>&lt;0.001</b> |

**Table S4:** Significance of test of the global model with all explanatory variables of topographic factors and soil properties at two layers of soil (0-15 cm depth and 15-30 cm depth) and Monte Carlo permutation test (permutations=4999).

| Source of variables | Df | Variance | R <sup>2</sup> Adjust | F    | Pr > F           |
|---------------------|----|----------|-----------------------|------|------------------|
| Model (0-15 cm)     | 17 | 0.224    | 0.099                 | 1.40 | <b>&lt;0.001</b> |
| Residual (0-15 cm)  | 48 | 0.453    |                       |      |                  |
| Model (15-30 cm)    | 17 | 0.218    | 0.083                 | 1.35 | <b>&lt;0.001</b> |
| Residual (15-30 cm) | 48 | 0.458    |                       |      |                  |

**Table S5:** Selection of important variables of topographic factors and soil properties at 0-15 cm depth of soil affecting the composition of tree species and variation of forest communities with forward selection at permutation = 4999. Ca – Extractable calcium, Clay – content of clay, Hd – mean hardness of soil, ELV – Elevation, Sand – content of sand, and Mg – Extractable magnesium.

| Selected Variables | Order | R <sup>2</sup> | R <sup>2</sup> | R <sup>2</sup> <sub>Adjust</sub> | F    | Pr     | Pr <sub>adj</sub> |
|--------------------|-------|----------------|----------------|----------------------------------|------|--------|-------------------|
|                    |       |                | Cumulation     | Cumulation                       |      |        |                   |
| Ca                 | 15    | 0.045          | 0.045          | 0.030                            | 3.01 | 0.0002 | 0.0034**          |
| Clay               | 10    | 0.034          | 0.079          | 0.049                            | 2.31 | 0.0002 | 0.0034**          |
| Hd                 | 4     | 0.025          | 0.104          | 0.060                            | 1.73 | 0.0030 | 0.0450*           |
| ELV                | 1     | 0.023          | 0.126          | 0.069                            | 1.59 | 0.0068 | 0.0952            |
| Sand               | 8     | 0.021          | 0.148          | 0.077                            | 1.54 | 0.0126 | 0.1368            |
| Mg                 | 17    | 0.019          | 0.169          | <b>0.083</b>                     | 1.38 | 0.0494 | 0.5928            |

\*\*\*p < 0.001, \*\*p < 0.01, \*p < 0.05

**Table S6:** Selection of important variables of topographic factors and soil properties at 15-30 cm depth of soil affecting the composition of tree species and variation of forest communities with forward selection at permutation = 4999. Hd – mean hardness of soil, Ca – Extractable calcium, ELV – elevation and BD – bulk density.

| Selected Variables | Order | R <sup>2</sup> | R <sup>2</sup> | R <sup>2</sup> <sub>Adjust</sub> | F    | Pr     | Pr <sub>adj</sub> |
|--------------------|-------|----------------|----------------|----------------------------------|------|--------|-------------------|
|                    |       |                | Cumulation     | Cumulation                       |      |        |                   |
| Hd                 | 4     | 0.035          | 0.035          | 0.020                            | 2.31 | 0.0002 | 0.0034**          |
| Ca                 | 15    | 0.033          | 0.068          | 0.038                            | 2.20 | 0.0002 | 0.0034**          |
| ELV                | 1     | 0.034          | 0.101          | 0.058                            | 2.32 | 0.0002 | 0.0034**          |
| BD                 | 6     | 0.024          | 0.125          | <b>0.067</b>                     | 1.65 | 0.0058 | 0.0812            |

\*\*\*p < 0.001, \*\*p < 0.01, \*p < 0.05
